# Supplementary material for: Allocation of Phosphorus Fractions in Chinese Fir in Response to Low Phosphorus Availability Using 32P Tracer
Source: MDPI journal article supplement (doi:10.3390/f13111769), 2022-10-27
Supplement: s1 [file s1]

Archive with 2 entries (2 files):
- Supplementary Figure S1.tif
- Supplementary File-Figure S1.pdf
