# Supplementary material for: Allocation of Phosphorus Fractions in Chinese Fir in Response to Low Phosphorus Availability Using 32P Tracer
Source: MDPI journal article supplement (doi:10.3390/f13111769), 2022-10-27
Supplement: s1 [file s1 › Supplementary File-Figure S1.pdf]

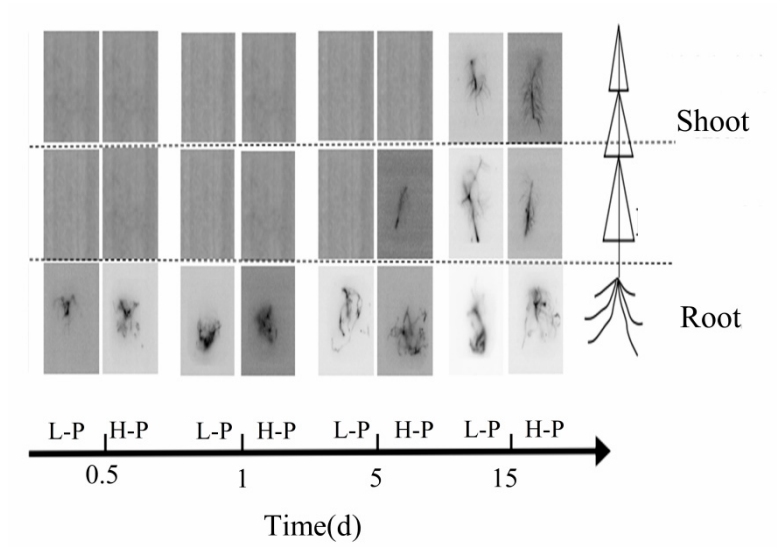

**Figure S1. The autoradiography of M1 Chinese fir after exogenous P absorbed in the plant.** The blackening part indicates the parts containing P of the Chinese fir plantlets. The higher the degree of blackening, the higher the content of P. Each column of images from top to bottom represents the upper part of the shoot, the lower part of the shoot and the root. The left and right image for each processing time represents the autoradiography of the Chinese fir plantlets under low- and high- P treatment, respectively.
